# Supplementary material for: A structural explanation for the low effectiveness of the seasonal influenza H3N2 vaccine
Source: PubMed Central journal article supplement (PMC5667890; doi:10.1371/journal.ppat.1006682), 2017-10-23
Supplement: ppat.1006682.s001.pdf [file ppat.1006682.s001.pdf]

| <b>Accession</b> | <b>Residue 194<sup>a</sup></b> |
|------------------|--------------------------------|
| AFN11834.1       | P                              |
| ABW23424.1       | L                              |
| ABW23422.1       | P                              |
| ADI44916.1       | X                              |
| AIW60702.1       | L                              |
| AIW60701.1       | P                              |
| AHX37617.1       | P                              |
| AIU46080.1       | L                              |
| ABW23353.1       | P                              |
| ACO95270.1       | L                              |
| ACI26318.1       | L                              |

<sup>a</sup>X indicates ambiguous amino acid
