# Supplementary material for: A structural explanation for the low effectiveness of the seasonal influenza H3N2 vaccine
Source: PubMed Central journal article supplement (PMC5667890; doi:10.1371/journal.ppat.1006682), 2017-10-23
Supplement: ppat.1006682.s002.pdf [file ppat.1006682.s002.pdf]

| <b>Strain</b> | <b>Accession</b> | <b>Residue 194</b> |
|---------------|------------------|--------------------|
| HK14          | EPI_ISL_270160   | P                  |
|               | EPI_ISL_233740   | L                  |
|               | EPI_ISL_202569   | L                  |
|               | EPI_ISL_198222   | L                  |
|               | EPI_ISL_195755   | P                  |
|               | EPI_ISL_189814   | P                  |
|               | EPI_ISL_176512   | P                  |
|               | EPI_ISL_165554   | L                  |
| Sing16        | EPI_ISL_239803   | P                  |
|               | EPI_ISL_225834   | L                  |
|               | EPI_ISL_275709   | P                  |
|               | EPI_ISL_257001   | P                  |
