# Supplementary material for: A structural explanation for the low effectiveness of the seasonal influenza H3N2 vaccine
Source: PubMed Central journal article supplement (PMC5667890; doi:10.1371/journal.ppat.1006682), 2017-10-23
Supplement: ppat.1006682.s003.pdf [file ppat.1006682.s003.pdf]

| <b>Data collection</b>                           | Bris07 P194 Apo                  | Bris07 L194 Apo (Low Res)        | Bris07 L194 Apo (High Res)       |
|--------------------------------------------------|----------------------------------|----------------------------------|----------------------------------|
| Beamline                                         | APS 23ID-D                       | SSRL 12-2                        | SSRL 12-2                        |
| Wavelength (Å)                                   | 1.0332                           | 0.9795                           | 0.9795                           |
| Space group                                      | H32                              | H32                              | H32                              |
| Unit cell parameters                             | a=b=100.5, c=383.3               | a=b=100.6, c=382.6               | a=b=100.6, c=384.2               |
| Resolution (Å)                                   | 50-2.30 (2.37-2.30) <sup>a</sup> | 50-2.35 (2.43-2.35) <sup>a</sup> | 50-1.70 (1.76-1.70) <sup>a</sup> |
| Unique Reflections                               | 34,068 (2,928) <sup>a</sup>      | 31,953 (3,148) <sup>a</sup>      | 81,614 (8,029) <sup>a</sup>      |
| Redundancy                                       | 16.2 (9.0) <sup>a</sup>          | 15.5 (15.2) <sup>a</sup>         | 19.0 (18.7) <sup>a</sup>         |
| Completeness (%)                                 | 99.6 (95.9) <sup>a</sup>         | 99.9 (100.0) <sup>a</sup>        | 100.0 (100.0) <sup>a</sup>       |
| <I/σ>                                            | 31.7 (1.6) <sup>a</sup>          | 34.1 (2.8) <sup>a</sup>          | 51.1 (3.1) <sup>a</sup>          |
| $R_{\text{sym}}^b$                               | 0.10 (0.70) <sup>a</sup>         | 0.11 (0.84) <sup>a</sup>         | 0.09 (0.87) <sup>a</sup>         |
| $R_{\text{pim}}^b$                               | 0.03 (0.22) <sup>a</sup>         | 0.03 (0.22) <sup>a</sup>         | 0.02 (0.21) <sup>a</sup>         |
| $CC_{1/2}^c$                                     | 1.00 (0.79) <sup>a</sup>         | 1.00 (0.93) <sup>a</sup>         | 1.00 (0.93) <sup>a</sup>         |
| $Z_a^d$                                          | 1                                | 1                                | 1                                |
| <b>Refinement statistics</b>                     |                                  |                                  |                                  |
| Resolution (Å)                                   | 50-2.30                          | 50-2.35                          | 50-1.70                          |
| Reflections (work)                               | 32,293                           | 30,220                           | 77,511                           |
| Reflections (test)                               | 1,754                            | 1,626                            | 4,100                            |
| $R_{\text{cryst}}(\%)^e / R_{\text{free}}(\%)^f$ | 19.7 / 23.2                      | 21.6 / 26.2                      | 16.9 / 19.6                      |
| No. of atoms                                     |                                  |                                  |                                  |
| Protein                                          | 3,927                            | 3,889                            | 3,905                            |
| Water                                            | 164                              | 127                              | 492                              |
| Glycan                                           | 184                              | 198                              | 187                              |
| Average B-value (Å <sup>2</sup> )                |                                  |                                  |                                  |
| Protein                                          | 59                               | 65                               | 35                               |
| Water                                            | 51                               | 52                               | 46                               |
| Glycan                                           | 98                               | 99                               | 57                               |
| Wilson B-value (Å <sup>2</sup> )                 | 40                               | 43                               | 22                               |
| <b>RMSD from ideal geometry</b>                  |                                  |                                  |                                  |
| Bond length (Å)                                  | 0.012                            | 0.010                            | 0.012                            |
| Bond angle (°)                                   | 1.53                             | 1.46                             | 1.52                             |
| <b>Ramachandran statistics (%)</b>               |                                  |                                  |                                  |
| Favored                                          | 96.4                             | 95.7                             | 96.2                             |
| Outliers                                         | 0.0                              | 0.0                              | 0.2                              |
| <b>PDB code</b>                                  | <b>6AOP</b>                      | <b>6AOQ</b>                      | <b>6AOR</b>                      |

<sup>a</sup> Numbers in parentheses refer to the highest resolution shell.

<sup>b</sup>  $R_{\text{sym}} = \sum_{hkl} \sum_i |I_{hkl,i} - \langle I_{hkl} \rangle| / \sum_{hkl} \sum_i I_{hkl,i}$  and  $R_{\text{pim}} = \sum_{hkl} (1/(n-1))^{1/2} \sum_i |I_{hkl,i} - \langle I_{hkl} \rangle| / \sum_{hkl} \sum_i I_{hkl,i}$ , where  $I_{hkl,i}$  is the scaled intensity of the  $i^{\text{th}}$  measurement of reflection  $h, k, l$ ,  $\langle I_{hkl} \rangle$  is the average intensity for that reflection, and  $n$  is the redundancy.

<sup>c</sup>  $CC_{1/2}$  = Pearson correlation coefficient between two random half datasets.

<sup>d</sup>  $Z_a$  is the number of HA protomers per crystallographic asymmetric unit.

<sup>e</sup>  $R_{\text{cryst}} = \sum_{hkl} |F_o - F_c| / \sum_{hkl} |F_o| \times 100$ , where  $F_o$  and  $F_c$  are the observed and calculated structure factors, respectively.

<sup>f</sup>  $R_{\text{free}}$  was calculated as for  $R_{\text{cryst}}$ , but on a test set comprising 5% of the data excluded from refinement.
