# Supplementary material for: A structural explanation for the low effectiveness of the seasonal influenza H3N2 vaccine
Source: PubMed Central journal article supplement (PMC5667890; doi:10.1371/journal.ppat.1006682), 2017-10-23
Supplement: ppat.1006682.s004.pdf [file ppat.1006682.s004.pdf]

| Data collection                                                          | Bris07 P194 3'SLNLN              | Bris07 P194 6'SLNLN              | Bris07 L194 3'SLNLN              | Bris07 L194 6'SLNLN              |
|--------------------------------------------------------------------------|----------------------------------|----------------------------------|----------------------------------|----------------------------------|
| Beamline                                                                 | SSRL 12-2                        | SSRL 12-2                        | SSRL 12-2                        | SSRL 12-2                        |
| Wavelength (Å)                                                           | 0.9795                           | 0.9795                           | 0.9795                           | 0.9795                           |
| Space group                                                              | H32                              | H32                              | H32                              | H32                              |
| Unit cell parameters                                                     | a=b=100.4, c=383.3               | a=b=100.3, c=384.3               | a=b=100.6, c=383.1               | a=b=100.7, c=385.1               |
| Resolution (Å)                                                           | 50-2.30 (2.37-2.30) <sup>a</sup> | 50-1.95 (2.01-1.95) <sup>a</sup> | 50-1.75 (1.81-1.75) <sup>a</sup> | 50-1.75 (1.81-1.75) <sup>a</sup> |
| Unique Reflections                                                       | 32,861 (2,878) <sup>a</sup>      | 55,042 (4,982) <sup>a</sup>      | 75,864 (7,484) <sup>a</sup>      | 75,889 (7,485) <sup>a</sup>      |
| Redundancy                                                               | 6.9 (6.6) <sup>a</sup>           | 9.1 (8.7) <sup>a</sup>           | 11.1 (9.8) <sup>a</sup>          | 18.5 (16.0) <sup>a</sup>         |
| Completeness (%)                                                         | 97.2 (96.4) <sup>a</sup>         | 99.2 (99.7) <sup>a</sup>         | 99.9 (99.9) <sup>a</sup>         | 99.8 (99.7) <sup>a</sup>         |
| <I/σ <sub>I</sub> >                                                      | 22.6 (1.6) <sup>a</sup>          | 44.6 (3.4) <sup>a</sup>          | 43.0 (2.2) <sup>a</sup>          | 55.4 (2.7) <sup>a</sup>          |
| R <sub>sym</sub> <sup>b</sup>                                            | 0.12 (0.86) <sup>a</sup>         | 0.09 (0.78) <sup>a</sup>         | 0.07 (0.90) <sup>a</sup>         | 0.09 (0.92) <sup>a</sup>         |
| R <sub>pim</sub> <sup>b</sup>                                            | 0.05 (0.34) <sup>a</sup>         | 0.03 (0.28) <sup>a</sup>         | 0.02 (0.30) <sup>a</sup>         | 0.02 (0.23) <sup>a</sup>         |
| CC <sub>1/2</sub> <sup>c</sup>                                           | 1.00 (0.82) <sup>a</sup>         | 1.00 (0.91) <sup>a</sup>         | 1.00 (0.88) <sup>a</sup>         | 1.00 (0.94) <sup>a</sup>         |
| Z <sub>a</sub> <sup>d</sup>                                              | 1                                | 1                                | 1                                | 1                                |
| <b>Refinement statistics</b>                                             |                                  |                                  |                                  |                                  |
| Resolution (Å)                                                           | 50-2.30                          | 50-1.95                          | 50-1.75                          | 50-1.75                          |
| Reflections (work)                                                       | 30,895                           | 52,423                           | 72,214                           | 72,000                           |
| Reflections (test)                                                       | 1,609                            | 2,651                            | 3,641                            | 3,862                            |
| R <sub>cryst</sub> (%) <sup>e</sup> / R <sub>free</sub> (%) <sup>f</sup> | 20.6 / 25.2                      | 18.3 / 20.3                      | 16.8 / 19.0                      | 17.4 / 19.6                      |
| No. of atoms                                                             |                                  |                                  |                                  |                                  |
| Protein                                                                  | 3,897                            | 3,902                            | 3,910                            | 3,908                            |
| Water                                                                    | 131                              | 326                              | 453                              | 462                              |
| Glycan                                                                   | 173                              | 173                              | 198                              | 184                              |
| Ligand <sup>g</sup>                                                      | 46                               | 32                               | 21                               | 71                               |
| Average B-value (Å <sup>2</sup> )                                        |                                  |                                  |                                  |                                  |
| Protein                                                                  | 55                               | 41                               | 36                               | 38                               |
| Water                                                                    | 51                               | 48                               | 46                               | 46                               |
| Glycan                                                                   | 92                               | 71                               | 60                               | 64                               |
| Ligand <sup>g</sup>                                                      | 92                               | 68                               | 101                              | 75                               |
| Wilson B-value (Å <sup>2</sup> )                                         | 42                               | 31                               | 28                               | 24                               |
| <b>RMSD from ideal geometry</b>                                          |                                  |                                  |                                  |                                  |
| Bond length (Å)                                                          | 0.011                            | 0.012                            | 0.012                            | 0.012                            |
| Bond angle (°)                                                           | 1.54                             | 1.55                             | 1.54                             | 1.56                             |
| <b>Ramachandran statistics (%)</b>                                       |                                  |                                  |                                  |                                  |
| Favored                                                                  | 96.2                             | 96.0                             | 96.2                             | 96.2                             |
| Outliers                                                                 | 0.0                              | 0.2                              | 0.0                              | 0.2                              |
| <b>PDB code</b>                                                          | <b>6AOS</b>                      | <b>6AOT</b>                      | <b>6AOU</b>                      | <b>6AOV</b>                      |

<sup>a</sup> Numbers in parentheses refer to the highest resolution shell.

<sup>b</sup>  $R_{sym} = \sum_{hkl} \sum_i |I_{hkl,i} - \langle I_{hkl} \rangle| / \sum_{hkl} \sum_i I_{hkl,i}$  and  $R_{pim} = \sum_{hkl} (1/(n-1))^{1/2} \sum_i |I_{hkl,i} - \langle I_{hkl} \rangle| / \sum_{hkl} \sum_i I_{hkl,i}$ , where  $I_{hkl,i}$  is the scaled intensity of the  $i^{\text{th}}$  measurement of reflection  $h, k, l$ ,  $\langle I_{hkl} \rangle$  is the average intensity for that reflection, and  $n$  is the redundancy.

<sup>c</sup> CC<sub>1/2</sub> = Pearson correlation coefficient between two random half datasets.

<sup>d</sup> Z<sub>a</sub> is the number of HA protomers per crystallographic asymmetric unit.

<sup>e</sup>  $R_{cryst} = \sum_{hkl} |F_o - F_c| / \sum_{hkl} |F_o| \times 100$ , where  $F_o$  and  $F_c$  are the observed and calculated structure factors, respectively.

<sup>f</sup>  $R_{free}$  was calculated as for  $R_{cryst}$ , but on a test set comprising 5% of the data excluded from refinement.

<sup>g</sup> Either 3'SLNLN or 6'SLNLN.
