# Supplementary material for: A structural explanation for the low effectiveness of the seasonal influenza H3N2 vaccine
Source: PubMed Central journal article supplement (PMC5667890; doi:10.1371/journal.ppat.1006682), 2017-10-23
Supplement: ppat.1006682.s005.pdf [file ppat.1006682.s005.pdf]

| HA Protein                    | Crystallization Condition                          |
|-------------------------------|----------------------------------------------------|
| Bris07 P194                   | 0.1 M CAPS pH 10.5 and 29% PEG 400                 |
| Bris07 L194 (high resolution) | 0.1 M bicine pH 9 and 41% 2-Methyl-2,4-pentanediol |
| Bris07 L194 (low resolution)  | 0.1 M CAPS pH 10.5 and 29% PEG 400                 |
