# Supplementary material for: A structural explanation for the low effectiveness of the seasonal influenza H3N2 vaccine
Source: PubMed Central journal article supplement (PMC5667890; doi:10.1371/journal.ppat.1006682), 2017-10-23
Supplement: ppat.1006682.s006.pdf [file ppat.1006682.s006.pdf]

**Bris07 P194**

**Bris07 L194**

**190-helix**

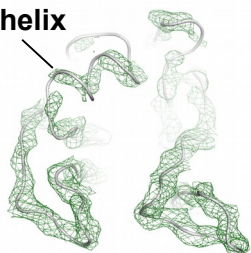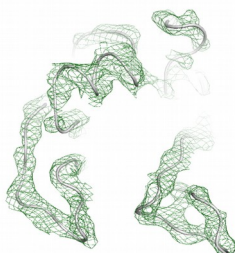

**1.2  $\sigma$**

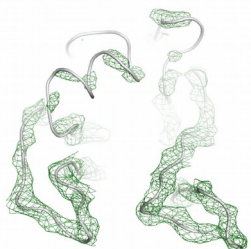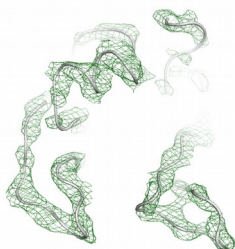

**1.4  $\sigma$**

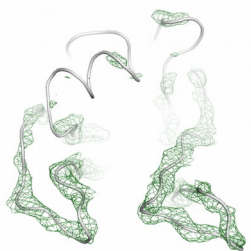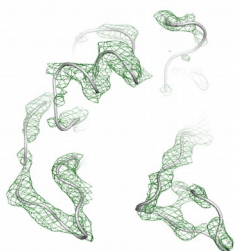

**1.6  $\sigma$**

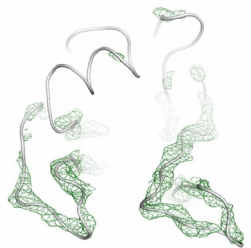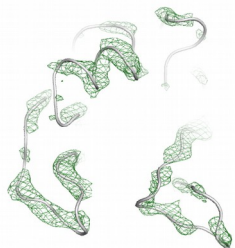

**1.8  $\sigma$**

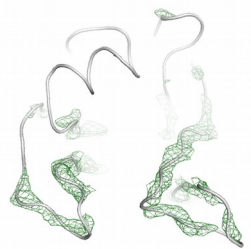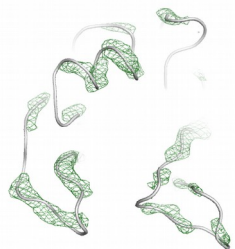

**2.0  $\sigma$**
