# Supplementary material for: A structural explanation for the low effectiveness of the seasonal influenza H3N2 vaccine
Source: PubMed Central journal article supplement (PMC5667890; doi:10.1371/journal.ppat.1006682), 2017-10-23

**A****Bris07 P194**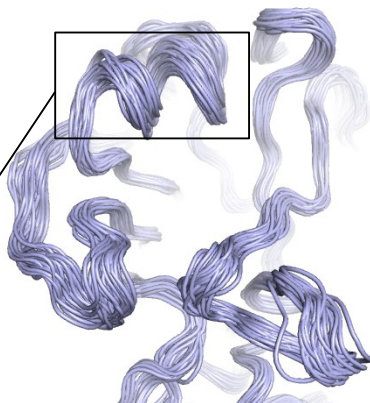**Bris07 L194**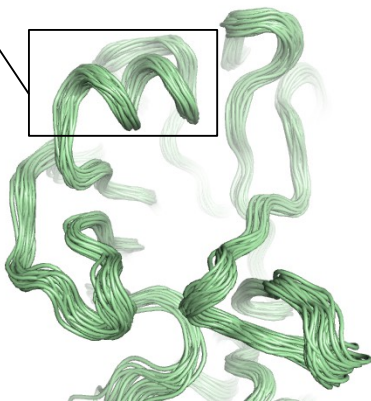**B**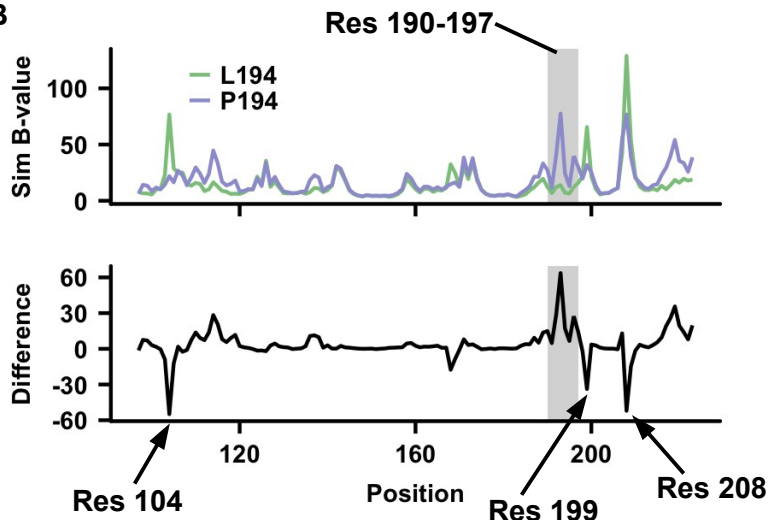**C**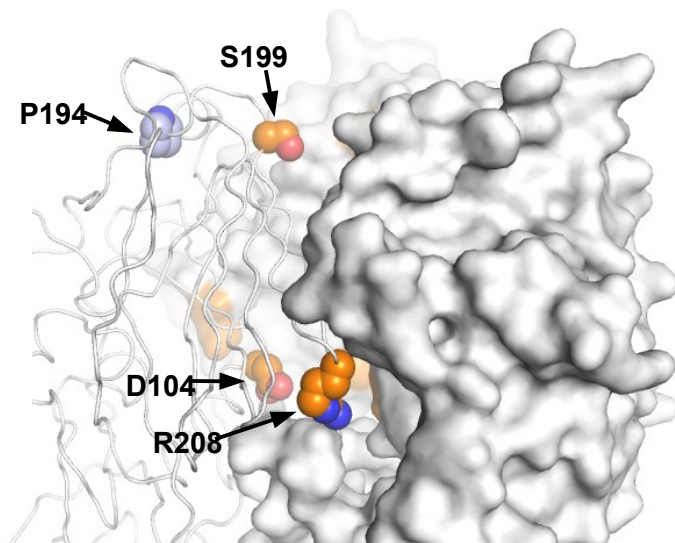

Supplement: ppat.1006682.s007.pdf [file ppat.1006682.s007.pdf]
