# Supplementary material for: A structural explanation for the low effectiveness of the seasonal influenza H3N2 vaccine
Source: PubMed Central journal article supplement (PMC5667890; doi:10.1371/journal.ppat.1006682), 2017-10-23

## Residues 214 to 218

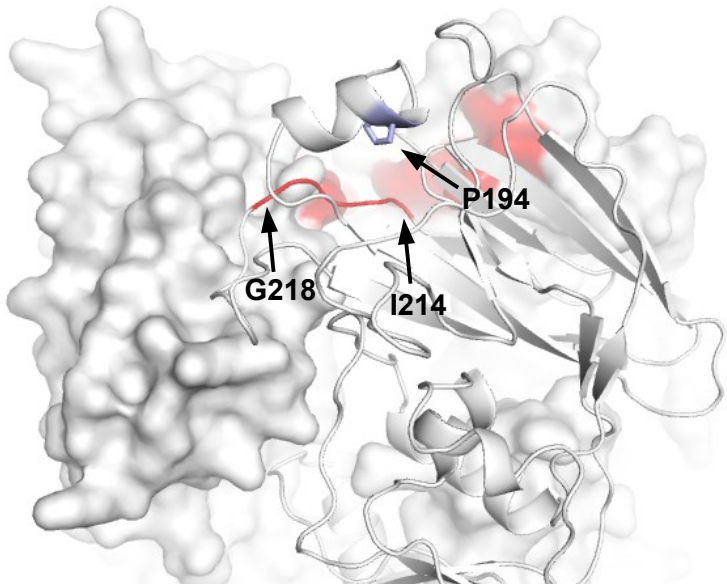

Supplement: ppat.1006682.s008.pdf [file ppat.1006682.s008.pdf]
