# Supplementary material for: A structural explanation for the low effectiveness of the seasonal influenza H3N2 vaccine
Source: PubMed Central journal article supplement (PMC5667890; doi:10.1371/journal.ppat.1006682), 2017-10-23

Switz13 WT Switz13 L194P

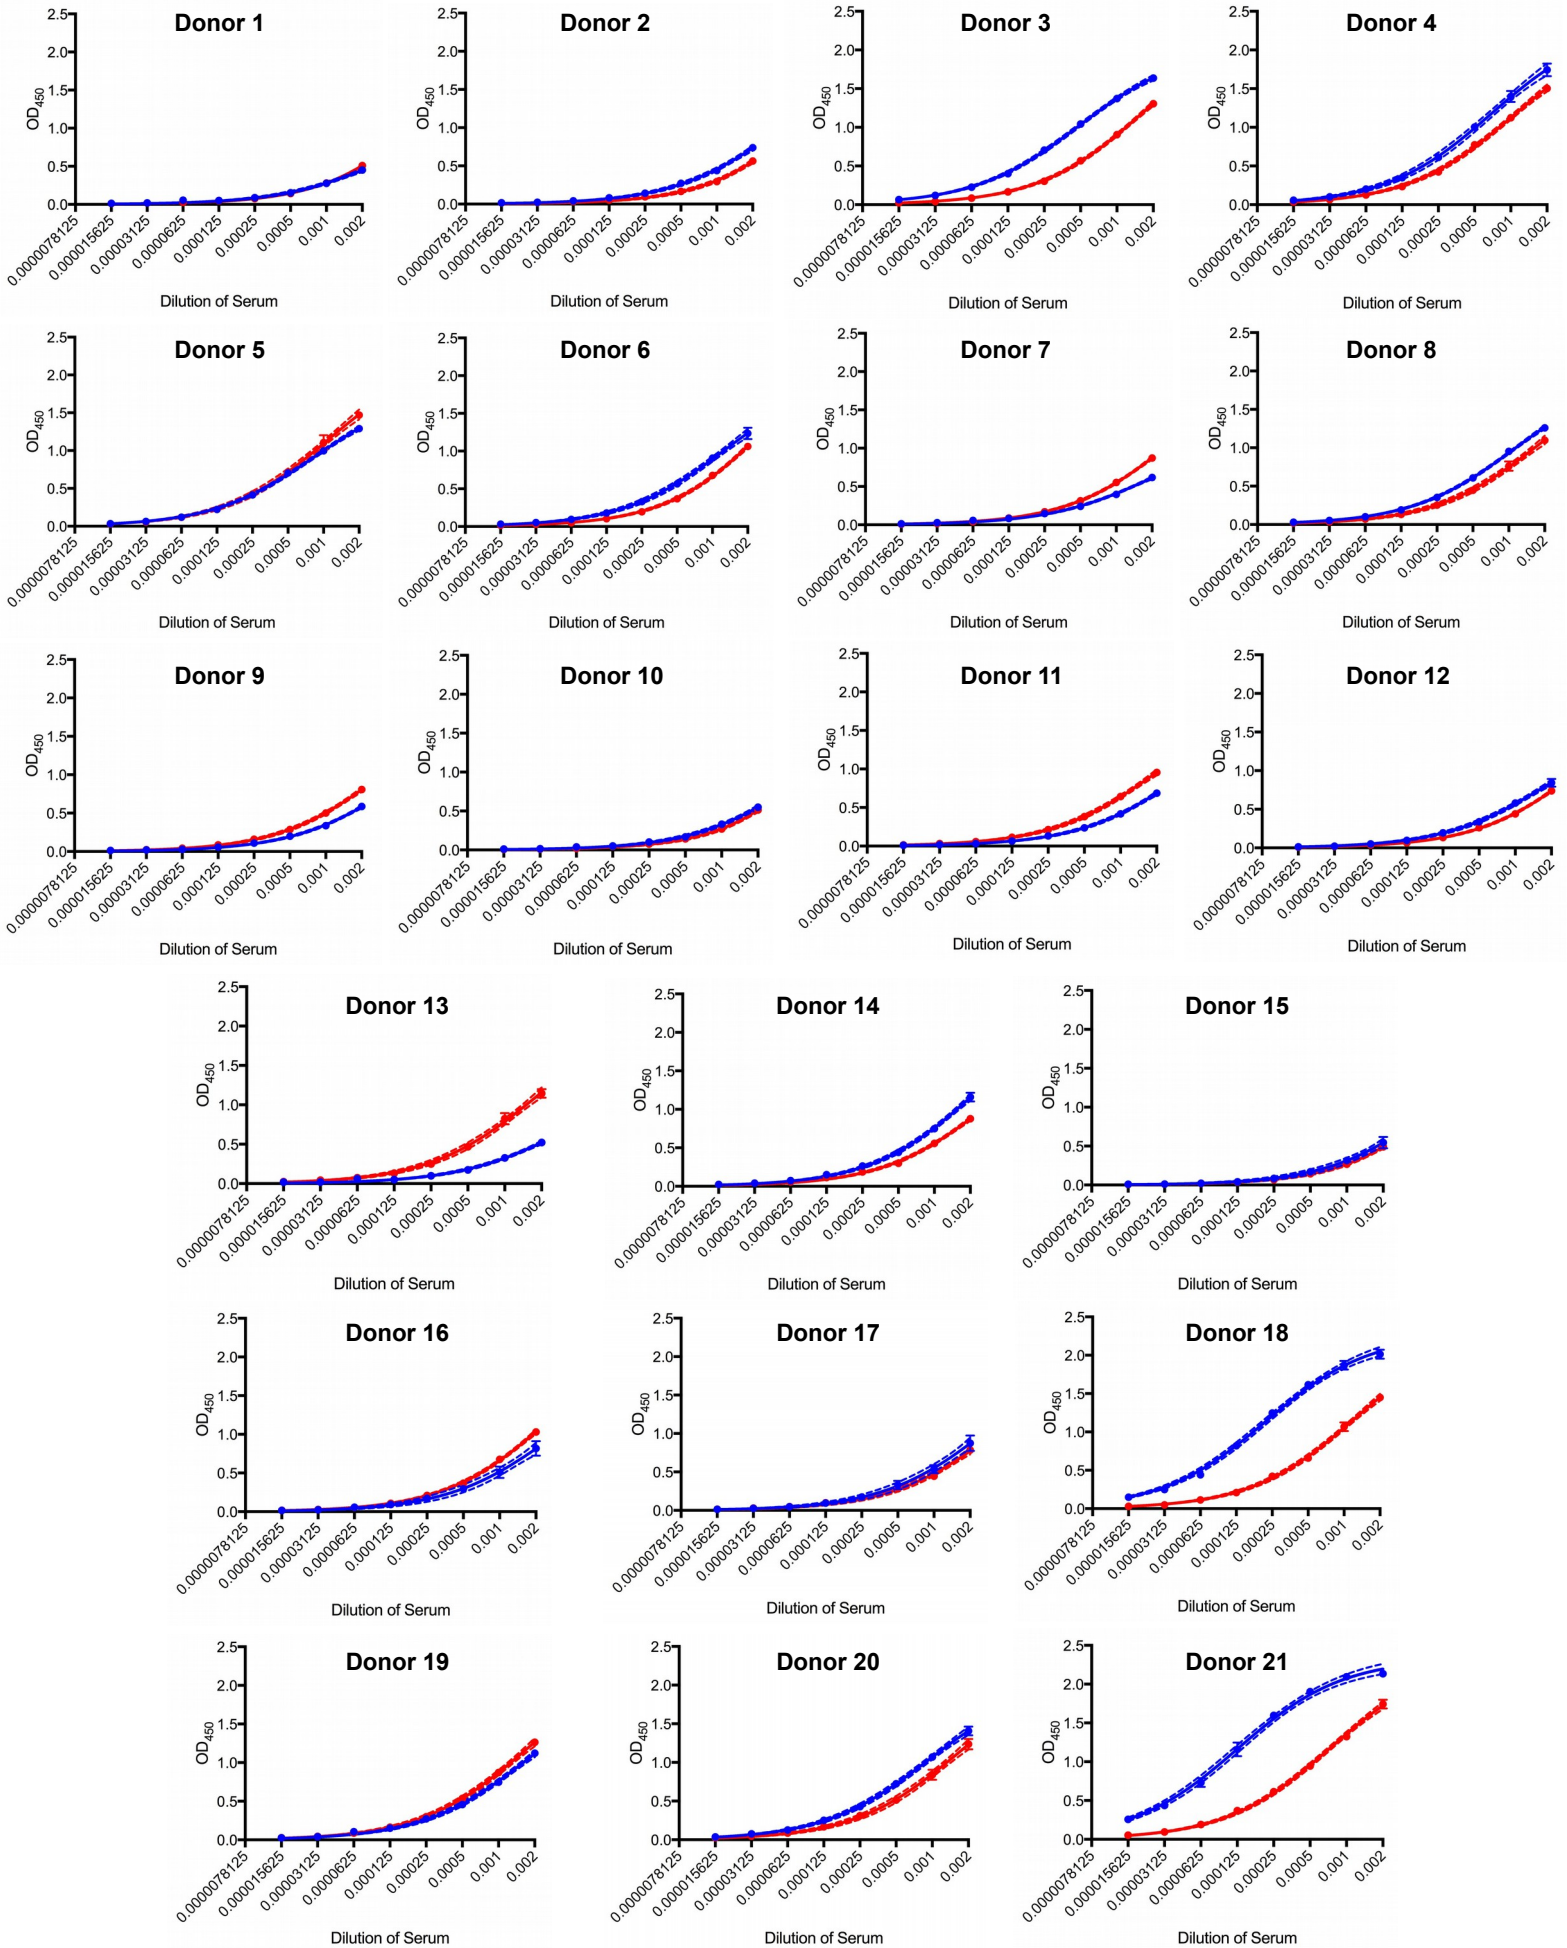

Supplement: ppat.1006682.s009.pdf [file ppat.1006682.s009.pdf]
