# Supplementary material for: A structural explanation for the low effectiveness of the seasonal influenza H3N2 vaccine
Source: PubMed Central journal article supplement (PMC5667890; doi:10.1371/journal.ppat.1006682), 2017-10-23
Supplement: ppat.1006682.s011.pdf [file ppat.1006682.s011.pdf]

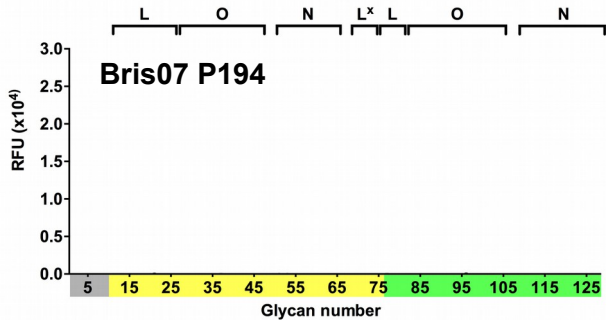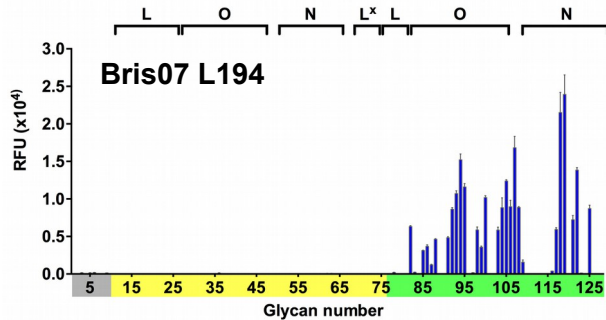

L: Linear  
 O: O-linked  
 N: N-linked  
 L<sup>x</sup>: Sialyl Lewis X

Non-sialosides  
 $\alpha$ 2-3 sialosides  
 $\alpha$ 2-6 sialosides
