# Supplementary material for: A structural explanation for the low effectiveness of the seasonal influenza H3N2 vaccine
Source: PubMed Central journal article supplement (PMC5667890; doi:10.1371/journal.ppat.1006682), 2017-10-23

**2Fo-Fc map**

**Omit (Fo-Fc) map**

**3'SLNLN  
in P194**

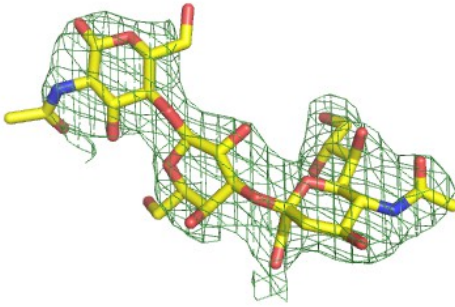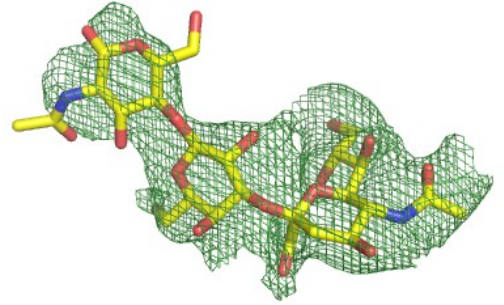

**6'SLNLN  
in P194**

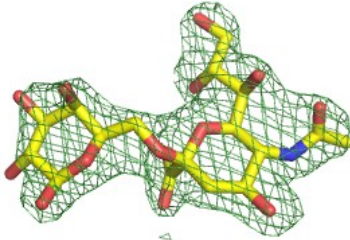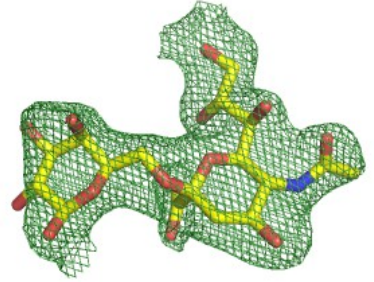

**3'SLNLN  
in L194**

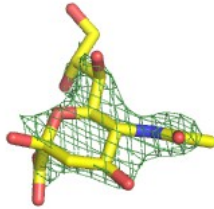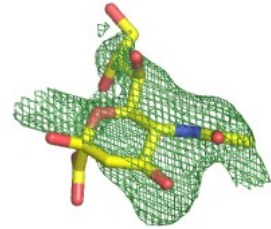

**6'SLNLN  
in L194**

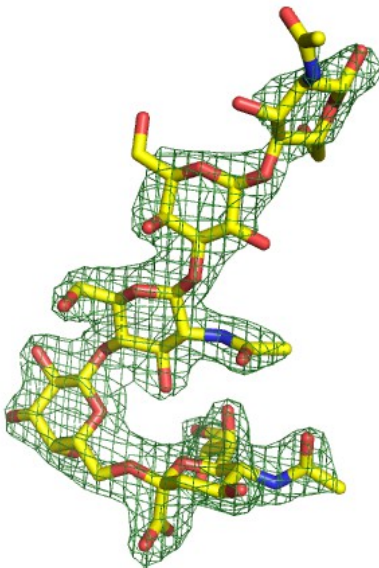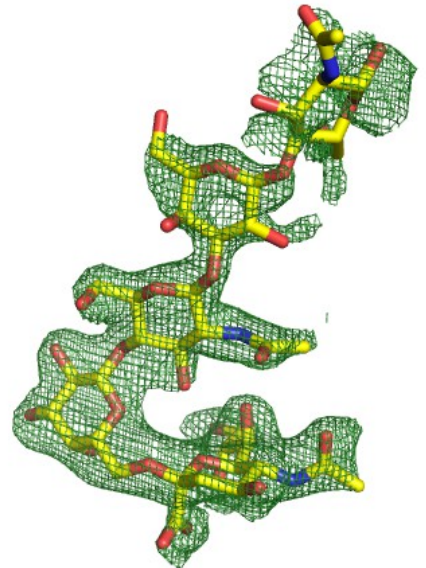

Supplement: ppat.1006682.s012.pdf [file ppat.1006682.s012.pdf]
