# Supplementary material for: A structural explanation for the low effectiveness of the seasonal influenza H3N2 vaccine
Source: PubMed Central journal article supplement (PMC5667890; doi:10.1371/journal.ppat.1006682), 2017-10-23

A/turkey/Turkey/1/2005 H5 (PDB 4BH0)

A/Vietnam/1194/2004 H5 (PDB 4BGX)

Bris07 P194

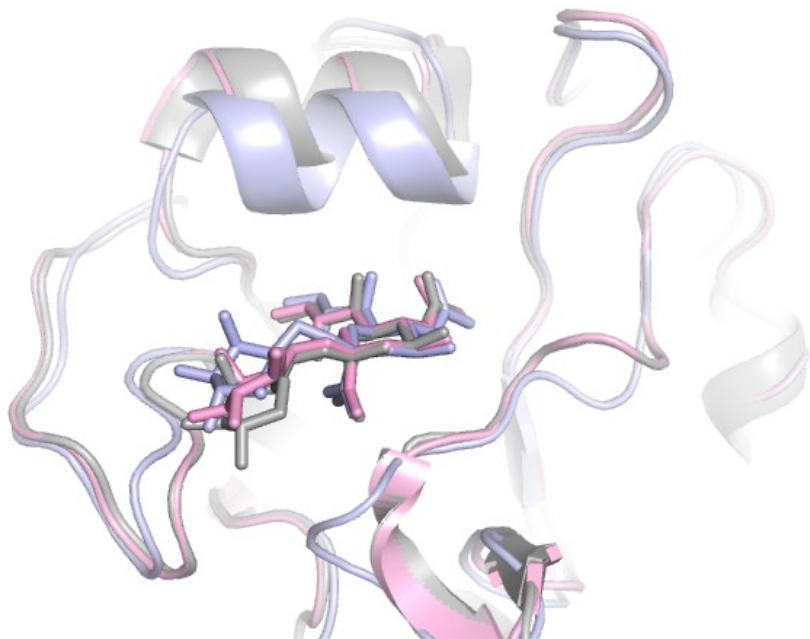

Supplement: ppat.1006682.s013.pdf [file ppat.1006682.s013.pdf]
