# Supplementary material for: A structural explanation for the low effectiveness of the seasonal influenza H3N2 vaccine
Source: PubMed Central journal article supplement (PMC5667890; doi:10.1371/journal.ppat.1006682), 2017-10-23
Supplement: ppat.1006682.s016.pdf [file ppat.1006682.s016.pdf]

| Glycan # | Common Name                                                                                                                                                                                                                                                                 | Structure |
|----------|-----------------------------------------------------------------------------------------------------------------------------------------------------------------------------------------------------------------------------------------------------------------------------|-----------|
| 1        | Gal $\beta$ (1-4)GlcNAc $\beta$ -ethyl-NH <sub>2</sub>                                                                                                                                                                                                                      |           |
| 2        | Gal $\beta$ (1-4)GlcNAc $\beta$ (1-3)Gal $\beta$ (1-3)GalNAc $\alpha$ -Thr-NH <sub>2</sub>                                                                                                                                                                                  |           |
| 3        | Gal $\beta$ (1-4)GlcNAc $\beta$ (1-6)[Gal $\beta$ (1-3)]-GalNAc $\alpha$ -Thr-NH <sub>2</sub>                                                                                                                                                                               |           |
| 4        | Gal $\beta$ (1-4)GlcNAc $\beta$ (1-3)GalNAc $\alpha$ -Thr-NH <sub>2</sub>                                                                                                                                                                                                   |           |
| 5        | Gal $\beta$ (1-4)GlcNAc $\beta$ (1-3)[Gal $\beta$ (1-4)GlcNAc $\beta$ (1-6)]-GalNAc $\alpha$ -Thr-NH <sub>2</sub>                                                                                                                                                           |           |
| 6        | Gal $\beta$ (1-4)GlcNAc $\beta$ (1-6)GalNAc $\alpha$ -Thr-NH <sub>2</sub>                                                                                                                                                                                                   |           |
| 7        | Gal $\beta$ (1-4)GlcNAc $\beta$ (1-2)Man $\alpha$ (1-3)[Gal $\beta$ (1-4)GlcNAc $\beta$ (1-2)Man $\alpha$ (1-6)]-Man $\beta$ (1-4)GlcNAc $\beta$ (1-4)GlcNAc $\beta$ -Asn-NH <sub>2</sub>                                                                                   |           |
| 8        | Gal $\beta$ (1-4)GlcNAc $\beta$ (1-2)Man $\alpha$ (1-3)[Gal $\beta$ (1-4)GlcNAc $\beta$ (1-2)Man $\alpha$ (1-6)]-Man $\beta$ (1-4)GlcNAc $\beta$ (1-4)[Fuc $\alpha$ (1-6)]-GlcNAc $\beta$ -Asn-Ser-Thr-NH <sub>2</sub>                                                      |           |
| 9        | Gal $\beta$ (1-4)GlcNAc $\beta$ (1-2)Man $\alpha$ (1-3){Gal $\beta$ (1-4)GlcNAc $\beta$ (1-2)[Gal $\beta$ (1-4)GlcNAc $\beta$ (1-2)]-Man $\alpha$ (1-6)}-Man $\beta$ (1-4)GlcNAc $\beta$ (1-4)GlcNAc $\beta$ -Asn-Lys-NH <sub>2</sub>                                       |           |
| 10       | Gal $\beta$ (1-4)GlcNAc $\beta$ (1-2)Man $\alpha$ (1-3){Gal $\beta$ (1-4)GlcNAc $\beta$ (1-2)[Gal $\beta$ (1-4)GlcNAc $\beta$ (1-2)]-Man $\alpha$ (1-6)}-Man $\beta$ (1-4)GlcNAc $\beta$ (1-4)[Fuc $\alpha$ (1-6)]-GlcNAc $\beta$ -(Lys-Val-Ala)Asn-Lys-Thr-NH <sub>2</sub> |           |
| 11       | NeuAc $\alpha$ (2-3)Gal $\beta$ (1-4)6-O-sulfo-GlcNAc $\beta$ -propyl-NH <sub>2</sub>                                                                                                                                                                                       |           |
| 12       | NeuAc $\alpha$ (2-3)Gal $\beta$ (1-4)[Fuc $\alpha$ (1-3)]-6-O-sulfo-GlcNAc $\beta$ -propyl-NH <sub>2</sub>                                                                                                                                                                  |           |
| 13       | NeuAc $\alpha$ (2-3)6-O-sulfo-Gal $\beta$ (1-4)GlcNAc $\beta$ -ethyl-NH <sub>2</sub>                                                                                                                                                                                        |           |
| 14       | NeuAc $\alpha$ (2-3)6-O-sulfo-Gal $\beta$ (1-4)[Fuc $\alpha$ (1-3)]-GlcNAc $\beta$ -propyl-NH <sub>2</sub>                                                                                                                                                                  |           |
| 15       | NeuAc $\alpha$ (2-3)Gal $\beta$ (1-3)6-O-sulfo-GlcNAc $\beta$ -propyl-NH <sub>2</sub>                                                                                                                                                                                       |           |
| 16       | NeuAc $\alpha$ (2-3)Gal $\beta$ (1-4)Glc $\beta$ -ethyl-NH <sub>2</sub>                                                                                                                                                                                                     |           |
| 17       | NeuAc $\alpha$ (2-3)Gal $\beta$ (1-4)GlcNAc $\beta$ -ethyl-NH <sub>2</sub>                                                                                                                                                                                                  |           |
| 18       | NeuAc $\alpha$ (2-3)Gal $\beta$ (1-4)GlcNAc $\beta$ (1-3)Gal $\beta$ (1-4)GlcNAc $\beta$ -ethyl-NH <sub>2</sub>                                                                                                                                                             |           |
| 19       | NeuAc $\alpha$ (2-3)Gal $\beta$ (1-4)GlcNAc $\beta$ (1-3)Gal $\beta$ (1-4)GlcNAc $\beta$ (1-3)Gal $\beta$ (1-4)GlcNAc $\beta$ -ethyl-NH <sub>2</sub>                                                                                                                        |           |

| Glycan # | Common Name                                                                                                                                                                                                                                                                                                                    | Structure                                                                             |
|----------|--------------------------------------------------------------------------------------------------------------------------------------------------------------------------------------------------------------------------------------------------------------------------------------------------------------------------------|---------------------------------------------------------------------------------------|
| 20       | NeuAc $\alpha$ (2-3)GalNAc $\beta$ (1-4)GlcNAc $\beta$ -ethyl-NH <sub>2</sub>                                                                                                                                                                                                                                                  | 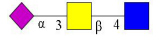   |
| 21       | NeuAc $\alpha$ (2-3)Gal $\beta$ (1-3)GlcNAc $\beta$ -ethyl-NH <sub>2</sub>                                                                                                                                                                                                                                                     |    |
| 22       | NeuAc $\alpha$ (2-3)Gal $\beta$ (1-3)GlcNAc $\beta$ (1-3)Gal $\beta$ (1-4)GlcNAc $\beta$ -ethyl-NH <sub>2</sub>                                                                                                                                                                                                                |    |
| 23       | NeuAc $\alpha$ (2-3)Gal $\beta$ (1-3)GlcNAc $\beta$ (1-3)Gal $\beta$ (1-3)GlcNAc $\beta$ -ethyl-NH <sub>2</sub>                                                                                                                                                                                                                |    |
| 24       | NeuAc $\alpha$ (2-3)Gal $\beta$ (1-3)GalNAc $\beta$ (1-3)Gal $\alpha$ (1-4)Gal $\beta$ (1-4)Glc $\beta$ -ethyl-NH <sub>2</sub>                                                                                                                                                                                                 |    |
| 25       | NeuAc $\alpha$ (2-3)Gal $\beta$ (1-3)GalNAc $\alpha$ -Thr-NH <sub>2</sub>                                                                                                                                                                                                                                                      |    |
| 26       | NeuAc $\alpha$ (2-3)Gal $\beta$ (1-4)GlcNAc $\beta$ (1-3)Gal $\beta$ (1-3)GalNAc $\alpha$ -Thr-NH <sub>2</sub>                                                                                                                                                                                                                 |    |
| 27       | NeuAc $\alpha$ (2-3)Gal $\beta$ (1-4)GlcNAc $\beta$ (1-3)Gal $\beta$ (1-4)GlcNAc $\beta$ (1-3)Gal $\beta$ (1-3)GalNAc $\alpha$ -Thr-NH <sub>2</sub>                                                                                                                                                                            |    |
| 28       | NeuAc $\alpha$ (2-3)Gal $\beta$ (1-4)GlcNAc $\beta$ (1-3)Gal $\beta$ (1-4)GlcNAc $\beta$ (1-3)Gal $\beta$ (1-4)GlcNAc $\beta$ (1-3)Gal $\beta$ (1-3)GalNAc $\alpha$ -Thr-NH <sub>2</sub>                                                                                                                                       |     |
| 29       | NeuAc $\alpha$ (2-3)Gal $\beta$ (1-4)GlcNAc $\beta$ (1-3)Gal $\beta$ (1-3)GalNAc $\alpha$ -Thr-NH <sub>2</sub>                                                             |     |
| 30       | NeuAc $\alpha$ (2-3)Gal $\beta$ (1-4)GlcNAc $\beta$ (1-3)Gal $\beta$ (1-3)GalNAc $\alpha$ -Thr-NH <sub>2</sub>                                                             |   |
| 31       | NeuAc $\alpha$ (2-3)Gal $\beta$ (1-4)GlcNAc $\beta$ (1-6)[Gal $\beta$ (1-3)]-GalNAc $\alpha$ -Thr-NH <sub>2</sub>                                                                                                                                                                                                              |  |
| 32       | NeuAc $\alpha$ (2-3)Gal $\beta$ (1-4)GlcNAc $\beta$ (1-3)Gal $\beta$ (1-4)GlcNAc $\beta$ (1-6)[Gal $\beta$ (1-3)]-GalNAc $\alpha$ -Thr-NH <sub>2</sub>                                                                                                                                                                         |  |
| 33       | NeuAc $\alpha$ (2-3)Gal $\beta$ (1-4)GlcNAc $\beta$ (1-3)Gal $\beta$ (1-4)GlcNAc $\beta$ (1-3)Gal $\beta$ (1-4)GlcNAc $\beta$ (1-6)[Gal $\beta$ (1-3)]-GalNAc $\alpha$ -Thr-NH <sub>2</sub>                                                                                                                                    |   |
| 34       | NeuAc $\alpha$ (2-3)Gal $\beta$ (1-4)GlcNAc $\beta$ (1-3)Gal $\beta$ (1-4)GlcNAc $\beta$ (1-3)Gal $\beta$ (1-4)GlcNAc $\beta$ (1-6)[Gal $\beta$ (1-3)]-GalNAc $\alpha$ -Thr-NH <sub>2</sub>                                                                                                                                    |   |
| 35       | NeuAc $\alpha$ (2-3)Gal $\beta$ (1-4)GlcNAc $\beta$ (1-3)Gal $\beta$ (1-4)GlcNAc $\beta$ (1-3)Gal $\beta$ (1-4)GlcNAc $\beta$ (1-3)Gal $\beta$ (1-4)GlcNAc $\beta$ (1-6)[Gal $\beta$ (1-3)]-GalNAc $\alpha$ -Thr-NH <sub>2</sub>                                                                                               |   |
| 36       | NeuAc $\alpha$ (2-3)Gal $\beta$ (1-4)GlcNAc $\beta$ (1-3)Gal $\beta$ (1-4)GlcNAc $\beta$ (1-3)Gal $\beta$ (1-4)GlcNAc $\beta$ (1-6)[NeuAc $\alpha$ (2-3)Gal $\beta$ (1-4)GlcNAc $\beta$ (1-3)Gal $\beta$ (1-4)GlcNAc $\beta$ (1-3)Gal $\beta$ (1-4)GlcNAc $\beta$ (1-3)Gal $\beta$ (1-3)]-GalNAc $\alpha$ -Thr-NH <sub>2</sub> |   |



| Glycan # | Common Name                                                                                                                                                                                                                                                                                                                                                                                                | Structure |
|----------|------------------------------------------------------------------------------------------------------------------------------------------------------------------------------------------------------------------------------------------------------------------------------------------------------------------------------------------------------------------------------------------------------------|-----------|
| 49       | NeuAc $\alpha$ (2-3)Gal $\beta$ (1-4)GlcNAc $\beta$ (1-3)Gal $\beta$ (1-4)GlcNAc $\beta$ (1-3)Gal $\beta$ (1-4)GlcNAc $\beta$ (1-3)Gal $\beta$ (1-4)GlcNAc $\beta$ (1-6)GalNAc $\alpha$ -Thr-NH <sub>2</sub>                                                                                                                                                                                               |           |
| 50       | NeuAc $\alpha$ (2-3)Gal $\beta$ (1-3)GlcNAc $\beta$ (1-3)Gal $\beta$ (1-4)GlcNAc $\beta$ (1-6)[NeuAc $\alpha$ (2-3)Gal $\beta$ (1-3)GlcNAc $\beta$ (1-3)] Gal $\beta$ (1-4)GlcNAc $\beta$ -ethyl-NH <sub>2</sub>                                                                                                                                                                                           |           |
| 51       | NeuAc $\alpha$ (2-3)Gal $\beta$ (1-4)GlcNAc $\beta$ (1-3)Gal $\beta$ (1-4)GlcNAc $\beta$ (1-3)Gal $\beta$ (1-4)GlcNAc $\beta$ (1-6)[NeuAc $\alpha$ (2-3)Gal $\beta$ (1-4)GlcNAc $\beta$ (1-3)Gal $\beta$ (1-4)GlcNAc $\beta$ (1-3)] Gal $\beta$ (1-4)GlcNAc $\beta$ -ethyl-NH <sub>2</sub>                                                                                                                 |           |
| 52       | NeuAc $\alpha$ (2-3)Gal $\beta$ (1-4)GlcNAc $\beta$ (1-2)Man $\alpha$ (1-3)[NeuAc $\alpha$ (2-3)Gal $\beta$ (1-4)GlcNAc $\beta$ (1-2)Man $\alpha$ (1-6)]-Man $\beta$ (1-4)GlcNAc $\beta$ (1-4)GlcNAc $\beta$ -Asn-NH <sub>2</sub>                                                                                                                                                                          |           |
| 53       | NeuAc $\alpha$ (2-3)Gal $\beta$ (1-4)GlcNAc $\beta$ (1-3)Gal $\beta$ (1-4)GlcNAc $\beta$ (1-2)Man $\alpha$ (1-3)[NeuAc $\alpha$ (2-3)Gal $\beta$ (1-4)GlcNAc $\beta$ (1-3)Gal $\beta$ (1-4)GlcNAc $\beta$ (1-2)Man $\alpha$ (1-6)]-Man $\beta$ (1-4)GlcNAc $\beta$ (1-4)GlcNAc $\beta$ -Asn-NH <sub>2</sub>                                                                                                |           |
| 54       | NeuAc $\alpha$ (2-3)Gal $\beta$ (1-4)GlcNAc $\beta$ (1-3)Gal $\beta$ (1-4)GlcNAc $\beta$ (1-3)Gal $\beta$ (1-4)GlcNAc $\beta$ (1-2)Man $\alpha$ (1-3)[NeuAc $\alpha$ (2-3)Gal $\beta$ (1-4)GlcNAc $\beta$ (1-3)Gal $\beta$ (1-4)GlcNAc $\beta$ (1-3)Gal $\beta$ (1-4)GlcNAc $\beta$ (1-2)Man $\alpha$ (1-6)]-Man $\beta$ (1-4)GlcNAc $\beta$ (1-4)GlcNAc $\beta$ -Asn-NH <sub>2</sub>                      |           |
| 55       | NeuAc $\alpha$ (2-3)Gal $\beta$ (1-4)GlcNAc $\beta$ (1-3)Gal $\beta$ (1-4)GlcNAc $\beta$ (1-2)Man $\alpha$ (1-3)[NeuAc $\alpha$ (2-3)Gal $\beta$ (1-4)GlcNAc $\beta$ (1-3)Gal $\beta$ (1-4)GlcNAc $\beta$ (1-2)Man $\alpha$ (1-6)]-Man $\beta$ (1-4)GlcNAc $\beta$ (1-4)GlcNAc $\beta$ -(Lys-Val-Ala)Asn-Lys-Thr-NH <sub>2</sub>                                                                           |           |
| 56       | NeuAc $\alpha$ (2-3)Gal $\beta$ (1-4)GlcNAc $\beta$ (1-3)Gal $\beta$ (1-4)GlcNAc $\beta$ (1-3)Gal $\beta$ (1-4)GlcNAc $\beta$ (1-2)Man $\alpha$ (1-3)[NeuAc $\alpha$ (2-3)Gal $\beta$ (1-4)GlcNAc $\beta$ (1-3)Gal $\beta$ (1-4)GlcNAc $\beta$ (1-3)Gal $\beta$ (1-4)GlcNAc $\beta$ (1-2)Man $\alpha$ (1-6)]-Man $\beta$ (1-4)GlcNAc $\beta$ (1-4)GlcNAc $\beta$ -(Lys-Val-Ala)Asn-Lys-Thr-NH <sub>2</sub> |           |
| 57       | NeuAc $\alpha$ (2-3)Gal $\beta$ (1-4)GlcNAc $\beta$ (1-3)Gal $\beta$ (1-4)GlcNAc $\beta$ (1-3)Gal $\beta$ (1-4)GlcNAc $\beta$ (1-2)Man $\alpha$ (1-3)[NeuAc $\alpha$ (2-3)Gal $\beta$ (1-4)GlcNAc $\beta$ (1-3)Gal $\beta$ (1-4)GlcNAc $\beta$ (1-3)Gal $\beta$ (1-4)GlcNAc $\beta$ (1-2)Man $\alpha$ (1-6)]-Man $\beta$ (1-4)GlcNAc $\beta$ (1-4)GlcNAc $\beta$ -(Lys-Val-Ala)Asn-Lys-Thr-NH <sub>2</sub> |           |

| Glycan # | Common Name                                                                                                                                                                                                                                                                                                                                                                                                                                                                                                | Structure |
|----------|------------------------------------------------------------------------------------------------------------------------------------------------------------------------------------------------------------------------------------------------------------------------------------------------------------------------------------------------------------------------------------------------------------------------------------------------------------------------------------------------------------|-----------|
| 58       | NeuAc $\alpha$ (2-3)Gal $\beta$ (1-4)GlcNAc $\beta$ (1-3)Gal $\beta$ (1-4)GlcNAc $\beta$ (1-3)Gal $\beta$ (1-4)GlcNAc $\beta$ (1-3)Gal $\beta$ (1-4)GlcNAc $\beta$ (1-2)Man $\alpha$ (1-3)[NeuAc $\alpha$ (2-3)Gal $\beta$ (1-4)GlcNAc $\beta$ (1-3)Gal $\beta$ (1-4)GlcNAc $\beta$ (1-3)Gal $\beta$ (1-4)GlcNAc $\beta$ (1-3)Gal $\beta$ (1-4)GlcNAc $\beta$ (1-2)Man $\alpha$ (1-6)]-Man $\beta$ (1-4)GlcNAc $\beta$ (1-4)GlcNAc $\beta$ -(Lys-Val-Ala)Asn-Lys-Thr-NH <sub>2</sub>                       |           |
| 59       | NeuAc $\alpha$ (2-3)Gal $\beta$ (1-4)GlcNAc $\beta$ (1-3)Gal $\beta$ (1-4)GlcNAc $\beta$ (1-3)Gal $\beta$ (1-4)GlcNAc $\beta$ (1-2)Man $\alpha$ (1-3)[NeuAc $\alpha$ (2-3)Gal $\beta$ (1-4)GlcNAc $\beta$ (1-3)Gal $\beta$ (1-4)GlcNAc $\beta$ (1-3)Gal $\beta$ (1-4)GlcNAc $\beta$ (1-2)Man $\alpha$ (1-6)]-Man $\beta$ (1-4)GlcNAc $\beta$ (1-4)[Fuc $\alpha$ (1-6)]-GlcNAc $\beta$ -(Lys-Val-Ala)Asn-Lys-Thr-NH <sub>2</sub>                                                                            |           |
| 60       | NeuAc $\alpha$ (2-3)Gal $\beta$ (1-4)GlcNAc $\beta$ (1-3)Gal $\beta$ (1-4)GlcNAc $\beta$ (1-3)Gal $\beta$ (1-4)GlcNAc $\beta$ (1-3)Gal $\beta$ (1-4)GlcNAc $\beta$ (1-2)Man $\alpha$ (1-3)[NeuAc $\alpha$ (2-3)Gal $\beta$ (1-4)GlcNAc $\beta$ (1-3)Gal $\beta$ (1-4)GlcNAc $\beta$ (1-3)Gal $\beta$ (1-4)GlcNAc $\beta$ (1-2)Man $\alpha$ (1-6)]-Man $\beta$ (1-4)GlcNAc $\beta$ (1-4)[Fuc $\alpha$ (1-6)]-GlcNAc $\beta$ -(Lys-Val-Ala)Asn-Lys-Thr-NH <sub>2</sub>                                       |           |
| 61       | NeuAc $\alpha$ (2-3)Gal $\beta$ (1-4)GlcNAc $\beta$ (1-3)Gal $\beta$ (1-4)GlcNAc $\beta$ (1-2)Man $\alpha$ (1-3){NeuAc $\alpha$ (2-3)Gal $\beta$ (1-4)GlcNAc $\beta$ (1-3)Gal $\beta$ (1-4)GlcNAc $\beta$ (1-2)[NeuAc $\alpha$ (2-3)Gal $\beta$ (1-4)GlcNAc $\beta$ (1-3)Gal $\beta$ (1-4)GlcNAc $\beta$ (1-6)Man $\alpha$ (1-6)]}-Man $\beta$ (1-4)GlcNAc $\beta$ (1-4)GlcNAc $\beta$ -(Lys-Val-Ala)Asn-Lys-Thr-NH <sub>2</sub>                                                                           |           |
| 62       | NeuAc $\alpha$ (2-3)Gal $\beta$ (1-4)GlcNAc $\beta$ (1-3)Gal $\beta$ (1-4)GlcNAc $\beta$ (1-3)Gal $\beta$ (1-4)GlcNAc $\beta$ (1-2)Man $\alpha$ (1-3){NeuAc $\alpha$ (2-3)Gal $\beta$ (1-4)GlcNAc $\beta$ (1-3)Gal $\beta$ (1-4)GlcNAc $\beta$ (1-3)Gal $\beta$ (1-4)GlcNAc $\beta$ (1-2)[NeuAc $\alpha$ (2-3)Gal $\beta$ (1-4)GlcNAc $\beta$ (1-3)Gal $\beta$ (1-4)GlcNAc $\beta$ (1-6)Man $\alpha$ (1-6)]}-Man $\beta$ (1-4)GlcNAc $\beta$ (1-4)GlcNAc $\beta$ -(Lys-Val-Ala)Asn-Lys-Thr-NH <sub>2</sub> |           |
| 63       | NeuAc $\alpha$ (2-3)Gal $\beta$ (1-4)GlcNAc $\beta$ (1-3)Gal $\beta$ (1-4)GlcNAc $\beta$ (1-2)Man $\alpha$ (1-3){NeuAc $\alpha$ (2-3)Gal $\beta$ (1-4)GlcNAc $\beta$ (1-3)Gal $\beta$ (1-4)GlcNAc $\beta$ (1-2)[NeuAc $\alpha$ (2-3)Gal $\beta$ (1-4)GlcNAc $\beta$ (1-3)Gal $\beta$ (1-4)GlcNAc $\beta$ (1-6)Man $\alpha$ (1-6)]}-Man $\beta$ (1-4)GlcNAc $\beta$ (1-4)[Fuc $\alpha$ (1-6)]-GlcNAc $\beta$ -(Lys-Val-Ala)Asn-Lys-Thr-NH <sub>2</sub>                                                      |           |

| Glycan # | Common Name                                                                                                                                                                                                                                                                                                                                                                                                                                                                                                                    | Structure |
|----------|--------------------------------------------------------------------------------------------------------------------------------------------------------------------------------------------------------------------------------------------------------------------------------------------------------------------------------------------------------------------------------------------------------------------------------------------------------------------------------------------------------------------------------|-----------|
| 64       | NeuAc $\alpha$ (2-3)Gal $\beta$ (1-4)GlcNAc $\beta$ (1-3)Gal $\beta$ (1-4)GlcNAc $\beta$ (1-3)Gal $\beta$ (1-4)GlcNAc $\beta$ (1-2)Man $\alpha$ (1-3){NeuAc $\alpha$ (2-3)Gal $\beta$ (1-4)GlcNAc $\beta$ (1-3)Gal $\beta$ (1-4)GlcNAc $\beta$ (1-3)Gal $\beta$ (1-4)GlcNAc $\beta$ (1-2)[NeuAc $\alpha$ (2-3)Gal $\beta$ (1-4)GlcNAc $\beta$ (1-3)Gal $\beta$ (1-4)GlcNAc $\beta$ (1-6)Man $\alpha$ (1-6)]-Man $\beta$ (1-4)GlcNAc $\beta$ (1-4)[Fuc $\alpha$ (1-6)]-GlcNAc $\beta$ -(Lys-Val-Ala)Asn-Lys-Thr-NH <sub>2</sub> |           |
| 65       | Gn/3'SLN/3'SLN-TriN                                                                                                                                                                                                                                                                                                                                                                                                                                                                                                            |           |
| 66       | NeuAc $\alpha$ (2-3)[GalNAc $\beta$ (1-4)]-Gal $\beta$ (1-4)GlcNAc $\beta$ -ethyl-NH <sub>2</sub>                                                                                                                                                                                                                                                                                                                                                                                                                              |           |
| 67       | NeuAc $\alpha$ (2-3)[GalNAc $\beta$ (1-4)]-Gal $\beta$ (1-4)Glc $\beta$ -ethyl-NH <sub>2</sub>                                                                                                                                                                                                                                                                                                                                                                                                                                 |           |
| 68       | Gal $\beta$ (1-3)GalNAc $\beta$ (1-4)[NeuAc $\alpha$ (2-3)]-Gal $\beta$ (1-4)Glc $\beta$ -ethyl-NH <sub>2</sub>                                                                                                                                                                                                                                                                                                                                                                                                                |           |
| 69       | NeuAc $\alpha$ (2-3)Gal $\beta$ (1-4)[Fuc $\alpha$ (1-3)]-GlcNAc $\beta$ -propyl-NH <sub>2</sub>                                                                                                                                                                                                                                                                                                                                                                                                                               |           |
| 70       | NeuAc $\alpha$ (2-3)Gal $\beta$ (1-3)[Fuc $\alpha$ (1-4)]-GlcNAc $\beta$ (1-3)Gal $\beta$ (1-4)[Fuc $\alpha$ (1-3)]-GlcNAc $\beta$ -ethyl-NH <sub>2</sub>                                                                                                                                                                                                                                                                                                                                                                      |           |
| 71       | NeuAc $\alpha$ (2-3)Gal $\beta$ (1-4)[Fuc $\alpha$ (1-3)]-GlcNAc $\beta$ (1-3)Gal $\beta$ (1-4)[Fuc $\alpha$ (1-3)]-GlcNAc $\beta$ -ethyl-NH <sub>2</sub>                                                                                                                                                                                                                                                                                                                                                                      |           |
| 72       | NeuAc $\alpha$ (2-3)Gal $\beta$ (1-4)[Fuc $\alpha$ (1-3)]-GlcNAc $\beta$ (1-3)Gal $\beta$ (1-4)[Fuc $\alpha$ (1-3)]-GlcNAc $\beta$ (1-3)Gal $\beta$ (1-4)[Fuc $\alpha$ (1-3)]-GlcNAc $\beta$ -ethyl-NH <sub>2</sub>                                                                                                                                                                                                                                                                                                            |           |
| 73       | NeuAc $\alpha$ (2-3)Gal $\beta$ (1-4)[Fuc $\alpha$ (1-3)]-GlcNAc $\beta$ (1-3)Gal $\beta$ (1-4)[Fuc $\alpha$ (1-3)]-GlcNAc $\beta$ (1-3)Gal $\beta$ (1-3)GalNAc $\alpha$ -Thr-NH <sub>2</sub>                                                                                                                                                                                                                                                                                                                                  |           |
| 74       | NeuAc $\alpha$ (2-3)Gal $\beta$ (1-4)[Fuc $\alpha$ (1-3)]-GlcNAc $\beta$ (1-3)Gal $\beta$ (1-4)[Fuc $\alpha$ (1-3)]-GlcNAc $\beta$ (1-3)Gal $\beta$ (1-4)[Fuc $\alpha$ (1-3)]-GlcNAc $\beta$ (1-3)GalNAc $\alpha$ -Thr-NH <sub>2</sub>                                                                                                                                                                                                                                                                                         |           |
| 75       | NeuAc $\alpha$ (2-3)Gal $\beta$ (1-4)[Fuc $\alpha$ (1-3)]-GlcNAc $\beta$ (1-3)Gal $\beta$ (1-4)[Fuc $\alpha$ (1-3)]-GlcNAc $\beta$ (1-3)Gal $\beta$ (1-4)[Fuc $\alpha$ (1-3)]-GlcNAc $\beta$ (1-3)[NeuAc $\alpha$ (2-3)Gal $\beta$ (1-4)[Fuc $\alpha$ (1-3)]-GlcNAc $\beta$ (1-3)Gal $\beta$ (1-4)[Fuc $\alpha$ (1-3)]-GlcNAc $\beta$ (1-6)]-GalNAc $\alpha$ -Thr-NH <sub>2</sub>                                                                                                                                              |           |

| Glycan # | Common Name                                                                                                                                                                                                                                                                                       | Structure                                                                             |
|----------|---------------------------------------------------------------------------------------------------------------------------------------------------------------------------------------------------------------------------------------------------------------------------------------------------|---------------------------------------------------------------------------------------|
| 76       | NeuAc $\alpha$ (2-3)Gal $\beta$ (1-4)[Fuc $\alpha$ (1-3)]-GlcNAc $\beta$ (1-2)Man $\alpha$ (1-3)[NeuAc $\alpha$ (2-3)Gal $\beta$ (1-4)[Fuc $\alpha$ (1-3)]-GlcNAc $\beta$ (1-2)Man $\alpha$ (1-6)]-Man $\beta$ (1-4)GlcNAc $\beta$ (1-4)GlcNAc $\beta$ -(Lys-Val-Ala)Asn-(Lys-Thr)NH <sub>2</sub> | 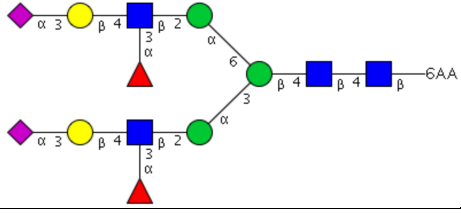   |
| 77       | NeuAc $\alpha$ (2-6)Gal $\beta$ (1-4)(6S)GlcNAc $\beta$ -ethyl-NH <sub>2</sub>                                                                                                                                                                                                                    |    |
| 78       | NeuAc $\alpha$ (2-6)Gal $\beta$ (1-4)6-O-sulfo-GlcNAc $\beta$ -propyl-NH <sub>2</sub>                                                                                                                                                                                                             |    |
| 79       | NeuAc $\alpha$ (2-6)Gal $\beta$ (1-4)Glc $\beta$ -ethyl-NH <sub>2</sub>                                                                                                                                                                                                                           |    |
| 80       | NeuAc $\alpha$ (2-6)Gal $\beta$ (1-4)GlcNAc $\beta$ -ethyl-NH <sub>2</sub>                                                                                                                                                                                                                        |    |
| 81       | NeuAc $\alpha$ (2-6)Gal $\beta$ (1-4)GlcNAc $\beta$ (1-3)Gal $\beta$ (1-4)GlcNAc $\beta$ -ethyl-NH <sub>2</sub>                                                                                                                                                                                   |    |
| 82       | NeuAc $\alpha$ (2-6)Gal $\beta$ (1-4)GlcNAc $\beta$ (1-3)Gal $\beta$ (1-4)GlcNAc $\beta$ (1-3)Gal $\beta$ (1-4)GlcNAc $\beta$ -ethyl-NH <sub>2</sub>                                                                                                                                              |    |
| 83       | NeuAc $\alpha$ (2-6)GalNAc $\beta$ (1-4)GlcNAc $\beta$ -ethyl-NH <sub>2</sub>                                                                                                                                                                                                                     |    |
| 84       | NeuAc $\alpha$ (2-6)Gal $\beta$ (1-4)GlcNAc $\beta$ (1-3)Gal $\beta$ (1-3)GalNAc $\alpha$ -Thr-NH <sub>2</sub>                                                                                                                                                                                    |    |
| 85       | NeuAc $\alpha$ (2-6)Gal $\beta$ (1-4)GlcNAc $\beta$ (1-3)Gal $\beta$ (1-4)GlcNAc $\beta$ (1-3)Gal $\beta$ (1-3)GalNAc $\alpha$ -Thr-NH <sub>2</sub>                                                                                                                                               |    |
| 86       | NeuAc $\alpha$ (2-6)Gal $\beta$ (1-4)GlcNAc $\beta$ (1-3)Gal $\beta$ (1-4)GlcNAc $\beta$ (1-3)Gal $\beta$ (1-4)GlcNAc $\beta$ (1-3)Gal $\beta$ (1-3)GalNAc $\alpha$ -Thr-NH <sub>2</sub>                                                                                                          |     |
| 87       | NeuAc $\alpha$ (2-6)Gal $\beta$ (1-4)GlcNAc $\beta$ (1-3)Gal $\beta$ (1-4)GlcNAc $\beta$ (1-3)Gal $\beta$ (1-4)GlcNAc $\beta$ (1-3)Gal $\beta$ (1-4)GlcNAc $\beta$ (1-3)Gal $\beta$ (1-3)GalNAc $\alpha$ -Thr-NH <sub>2</sub>                                                                     |    |
| 88       | NeuAc $\alpha$ (2-6)Gal $\beta$ (1-4)GlcNAc $\beta$ (1-3)Gal $\beta$ (1-4)GlcNAc $\beta$ (1-3)Gal $\beta$ (1-4)GlcNAc $\beta$ (1-3)Gal $\beta$ (1-4)GlcNAc $\beta$ (1-3)Gal $\beta$ (1-3)GalNAc $\alpha$ -Thr-NH <sub>2</sub>                                                                     |   |
| 89       | NeuAc $\alpha$ (2-6)Gal $\beta$ (1-4)GlcNAc $\beta$ (1-6)[Gal $\beta$ (1-3)]-GalNAc $\alpha$ -Thr-NH <sub>2</sub>                                                                                                                                                                                 |  |
| 90       | NeuAc $\alpha$ (2-6)Gal $\beta$ (1-4)GlcNAc $\beta$ (1-3)Gal $\beta$ (1-4)GlcNAc $\beta$ (1-6)[Gal $\beta$ (1-3)]-GalNAc $\alpha$ -Thr-NH <sub>2</sub>                                                                                                                                            |  |
| 91       | NeuAc $\alpha$ (2-6)Gal $\beta$ (1-4)GlcNAc $\beta$ (1-3)Gal $\beta$ (1-4)GlcNAc $\beta$ (1-3)Gal $\beta$ (1-4)GlcNAc $\beta$ (1-6)[Gal $\beta$ (1-3)]-GalNAc $\alpha$ -Thr-NH <sub>2</sub>                                                                                                       |   |
| 92       | NeuAc $\alpha$ (2-6)Gal $\beta$ (1-4)GlcNAc $\beta$ (1-3)Gal $\beta$ (1-4)GlcNAc $\beta$ (1-3)Gal $\beta$ (1-4)GlcNAc $\beta$ (1-3)Gal $\beta$ (1-4)GlcNAc $\beta$ (1-6)[Gal $\beta$ (1-3)]-GalNAc $\alpha$ -Thr-NH <sub>2</sub>                                                                  |   |

| Glycan # | Common Name                                                                                                                                                                                                                                                                                                                                                         | Structure |
|----------|---------------------------------------------------------------------------------------------------------------------------------------------------------------------------------------------------------------------------------------------------------------------------------------------------------------------------------------------------------------------|-----------|
| 93       | NeuAc $\alpha$ (2-6)Gal $\beta$ (1-4)GlcNAc $\beta$ (1-3)Gal $\beta$ (1-4)GlcNAc $\beta$ (1-3)Gal $\beta$ (1-4)GlcNAc $\beta$ (1-3)Gal $\beta$ (1-4)GlcNAc $\beta$ (1-6)[Gal $\beta$ (1-3)]-GalNAc $\alpha$ -Thr-NH <sub>2</sub>                                                                                                                                    |           |
| 94       | NeuAc $\alpha$ (2-6)Gal $\beta$ (1-4)GlcNAc $\beta$ (1-3)Gal $\beta$ (1-4)GlcNAc $\beta$ (1-3)Gal $\beta$ (1-4)GlcNAc $\beta$ (1-3)Gal $\beta$ (1-4)GlcNAc $\beta$ (1-6)[NeuAc $\alpha$ (2-6)Gal $\beta$ (1-4)GlcNAc $\beta$ (1-3)Gal $\beta$ (1-4)GlcNAc $\beta$ (1-3)Gal $\beta$ (1-4)GlcNAc $\beta$ (1-3)Gal $\beta$ (1-3)]-GalNAc $\alpha$ -Thr-NH <sub>2</sub> |           |
| 95       | NeuAc $\alpha$ (2-6)Gal $\beta$ (1-4)GlcNAc $\beta$ (1-3)Gal $\beta$ (1-4)GlcNAc $\beta$ (1-3)Gal $\beta$ (1-4)GlcNAc $\beta$ (1-3)Gal $\beta$ (1-4)GlcNAc $\beta$ (1-6)[NeuAc $\alpha$ (2-6)Gal $\beta$ (1-4)GlcNAc $\beta$ (1-3)Gal $\beta$ (1-4)GlcNAc $\beta$ (1-3)Gal $\beta$ (1-4)GlcNAc $\beta$ (1-3)Gal $\beta$ (1-3)]-GalNAc $\alpha$ -Thr-NH <sub>2</sub> |           |
| 96       | NeuAc $\alpha$ (2-6)Gal $\beta$ (1-4)GlcNAc $\beta$ (1-3)GalNAc $\alpha$ -Thr-NH <sub>2</sub>                                                                                                                                                                                                                                                                       |           |
| 97       | NeuAc $\alpha$ (2-6)Gal $\beta$ (1-4)GlcNAc $\beta$ (1-3)Gal $\beta$ (1-4)GlcNAc $\beta$ (1-3)GalNAc $\alpha$ -Thr-NH <sub>2</sub>                                                                                                                                                                                                                                  |           |
| 98       | NeuAc $\alpha$ (2-6)Gal $\beta$ (1-4)GlcNAc $\beta$ (1-3)Gal $\beta$ (1-4)GlcNAc $\beta$ (1-3)Gal $\beta$ (1-4)GlcNAc $\beta$ (1-3)GalNAc $\alpha$ -Thr-NH <sub>2</sub>                                                                                                                                                                                             |           |
| 99       | NeuAc $\alpha$ (2-6)Gal $\beta$ (1-4)GlcNAc $\beta$ (1-3)Gal $\beta$ (1-4)GlcNAc $\beta$ (1-3)Gal $\beta$ (1-4)GlcNAc $\beta$ (1-3)Gal $\beta$ (1-4)GlcNAc $\beta$ (1-3)GalNAc $\alpha$ -Thr-NH <sub>2</sub>                                                                                                                                                        |           |
| 100      | NeuAc $\alpha$ (2-6)Gal $\beta$ (1-4)GlcNAc $\beta$ (1-3)Gal $\beta$ (1-4)GlcNAc $\beta$ (1-3)Gal $\beta$ (1-4)GlcNAc $\beta$ (1-3)Gal $\beta$ (1-4)GlcNAc $\beta$ (1-3)GalNAc $\alpha$ -Thr-NH <sub>2</sub>                                                                                                                                                        |           |
| 101      | NeuAc $\alpha$ (2-6)Gal $\beta$ (1-4)GlcNAc $\beta$ (1-3)[NeuAc $\alpha$ (2-6)Gal $\beta$ (1-4)GlcNAc $\beta$ (1-6)]-GalNAc $\alpha$ -Thr-NH <sub>2</sub>                                                                                                                                                                                                           |           |
| 102      | NeuAc $\alpha$ (2-6)Gal $\beta$ (1-4)GlcNAc $\beta$ (1-3)Gal $\beta$ (1-4)GlcNAc $\beta$ (1-3)[NeuAc $\alpha$ (2-6)Gal $\beta$ (1-4)GlcNAc $\beta$ (1-3)Gal $\beta$ (1-4)GlcNAc $\beta$ (1-6)]-GalNAc $\alpha$ -Thr-NH <sub>2</sub>                                                                                                                                 |           |
| 103      | NeuAc $\alpha$ (2-6)Gal $\beta$ (1-4)GlcNAc $\beta$ (1-3)Gal $\beta$ (1-4)GlcNAc $\beta$ (1-3)Gal $\beta$ (1-4)GlcNAc $\beta$ (1-3)[NeuAc $\alpha$ (2-6)Gal $\beta$ (1-4)GlcNAc $\beta$ (1-3)Gal $\beta$ (1-4)GlcNAc $\beta$ (1-3)Gal $\beta$ (1-4)GlcNAc $\beta$ (1-6)]-GalNAc $\alpha$ -Thr-NH <sub>2</sub>                                                       |           |
| 104      | NeuAc $\alpha$ (2-6)Gal $\beta$ (1-4)GlcNAc $\beta$ (1-3)Gal $\beta$ (1-4)GlcNAc $\beta$ (1-6)]-GalNAc $\alpha$ -Thr-NH <sub>2</sub>                                                                            |           |





| Glycan # | Common Name                                                                                                                                                                                                                                                                                                                                                                                                                                                                          | Structure |
|----------|--------------------------------------------------------------------------------------------------------------------------------------------------------------------------------------------------------------------------------------------------------------------------------------------------------------------------------------------------------------------------------------------------------------------------------------------------------------------------------------|-----------|
| 116      | NeuAc $\alpha$ (2-6)Gal $\beta$ (1-4)GlcNAc $\beta$ (1-3)Gal $\beta$ (1-4)GlcNAc $\beta$ (1-3)Gal $\beta$ (1-4)GlcNAc $\beta$ (1-2)Man $\alpha$ (1-3)[NeuAc $\alpha$ (2-6)Gal $\beta$ (1-4)GlcNAc $\beta$ (1-3)Gal $\beta$ (1-4)GlcNAc $\beta$ (1-3)Gal $\beta$ (1-4)GlcNAc $\beta$ (1-2)Man $\alpha$ (1-6)]-Man $\beta$ (1-4)GlcNAc $\beta$ (1-4)GlcNAc $\beta$ -Asn-NH <sub>2</sub>                                                                                                |           |
| 117      | NeuAc $\alpha$ (2-6)Gal $\beta$ (1-4)GlcNAc $\beta$ (1-3)Gal $\beta$ (1-4)GlcNAc $\beta$ (1-3)Gal $\beta$ (1-4)GlcNAc $\beta$ (1-2)Man $\alpha$ (1-3)[NeuAc $\alpha$ (2-6)Gal $\beta$ (1-4)GlcNAc $\beta$ (1-3)Gal $\beta$ (1-4)GlcNAc $\beta$ (1-3)Gal $\beta$ (1-4)GlcNAc $\beta$ (1-2)Man $\alpha$ (1-6)]-Man $\beta$ (1-4)GlcNAc $\beta$ (1-4)GlcNAc $\beta$ -(Lys-Val-Ala)Asn-Lys-Thr-NH <sub>2</sub>                                                                           |           |
| 118      | NeuAc $\alpha$ (2-6)Gal $\beta$ (1-4)GlcNAc $\beta$ (1-3)Gal $\beta$ (1-4)GlcNAc $\beta$ (1-3)Gal $\beta$ (1-4)GlcNAc $\beta$ (1-2)Man $\alpha$ (1-3)[NeuAc $\alpha$ (2-6)Gal $\beta$ (1-4)GlcNAc $\beta$ (1-3)Gal $\beta$ (1-4)GlcNAc $\beta$ (1-3)Gal $\beta$ (1-4)GlcNAc $\beta$ (1-3)Gal $\beta$ (1-4)GlcNAc $\beta$ (1-2)Man $\alpha$ (1-6)]-Man $\beta$ (1-4)GlcNAc $\beta$ (1-4)GlcNAc $\beta$ -(Lys-Val-Ala)Asn-Lys-Thr-NH <sub>2</sub>                                      |           |
| 119      | NeuAc $\alpha$ (2-6)Gal $\beta$ (1-4)GlcNAc $\beta$ (1-3)Gal $\beta$ (1-4)GlcNAc $\beta$ (1-3)Gal $\beta$ (1-4)GlcNAc $\beta$ (1-3)Gal $\beta$ (1-4)GlcNAc $\beta$ (1-2)Man $\alpha$ (1-3)[NeuAc $\alpha$ (2-6)Gal $\beta$ (1-4)GlcNAc $\beta$ (1-3)Gal $\beta$ (1-4)GlcNAc $\beta$ (1-3)Gal $\beta$ (1-4)GlcNAc $\beta$ (1-3)Gal $\beta$ (1-4)GlcNAc $\beta$ (1-2)Man $\alpha$ (1-6)]-Man $\beta$ (1-4)GlcNAc $\beta$ (1-4)GlcNAc $\beta$ -(Lys-Val-Ala)Asn-Lys-Thr-NH <sub>2</sub> |           |
| 120      | NeuAc $\alpha$ (2-6)Gal $\beta$ (1-4)GlcNAc $\beta$ (1-3)Gal $\beta$ (1-4)GlcNAc $\beta$ (1-2)Man $\alpha$ (1-3)[NeuAc $\alpha$ (2-6)Gal $\beta$ (1-4)GlcNAc $\beta$ (1-3)Gal $\beta$ (1-4)GlcNAc $\beta$ (1-2)Man $\alpha$ (1-6)]-Man $\beta$ (1-4)GlcNAc $\beta$ (1-4)[Fuc $\alpha$ (1-6)]-GlcNAc $\beta$ -(Lys-Val-Ala)Asn-Lys-Thr-NH <sub>2</sub>                                                                                                                                |           |
| 121      | NeuAc $\alpha$ (2-6)Gal $\beta$ (1-4)GlcNAc $\beta$ (1-3)Gal $\beta$ (1-4)GlcNAc $\beta$ (1-3)Gal $\beta$ (1-4)GlcNAc $\beta$ (1-2)Man $\alpha$ (1-3)[NeuAc $\alpha$ (2-6)Gal $\beta$ (1-4)GlcNAc $\beta$ (1-3)Gal $\beta$ (1-4)GlcNAc $\beta$ (1-3)Gal $\beta$ (1-4)GlcNAc $\beta$ (1-2)Man $\alpha$ (1-6)]-Man $\beta$ (1-4)GlcNAc $\beta$ (1-4)[Fuc $\alpha$ (1-6)]-GlcNAc $\beta$ -(Lys-Val-Ala)Asn-Lys-Thr-NH <sub>2</sub>                                                      |           |
